# Supplementary material for: GmMYB114 Facilitates the Synthesis of Anthocyanins in Soybean Sprouts under Blue Light
Source: MDPI journal article supplement (doi:10.3390/plants13081107), 2024-04-16

## Supplemental figures

**Figure S1** The effect of darkness (Dk)/blue light (BL)/red light (RL) on the synthesis of anthocyanins in soybean sprouts. \* $p < 0.05$ .

**Figure S2** Expression level of *GmMYB114* in transcriptome described in our previous study. The transcriptome was conducted between the soybean hypocotyl samples under dark (Dk) and blue light (BL) conditions. \* $p < 0.05$ .

**Figure S3** The correlation between *GmMYB114* expression level and anthocyanin content. The expression level of *GmMYB114* was detected after being treated with blue light for 12 h, 24 h and 36 h. Also, the anthocyanin content was detected in the same time period. P indicated Pearson index, and the closer it is to 1, the more positive the correlation is.

**Figure S4** Verification of successful *GmMYB114* transformation in soybean hairy roots. (A) The hairy roots transformed with empty vector and *GmMYB114*-OX vector were verified using primers with vector homologous arms to clone *GmMYB114*. The appearance of PCR bands indicated successful transfer to *GmMYB114*. (B) The expression level of *GmMYB114* in soybean hairy roots successfully detected in (A) was detected by RT qPCR. \* $p < 0.05$ .

**Figure S5** Analysis of MYB binding sites in the *GmCHS/GmDFR/GmANS* promoter region.

Figure S1

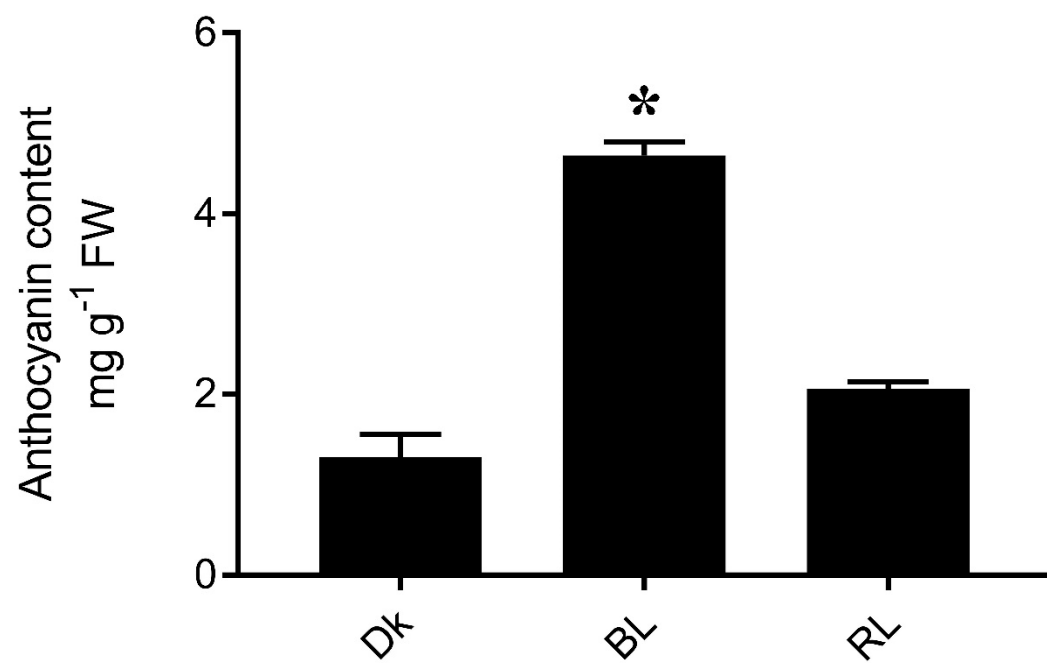

Figure S2

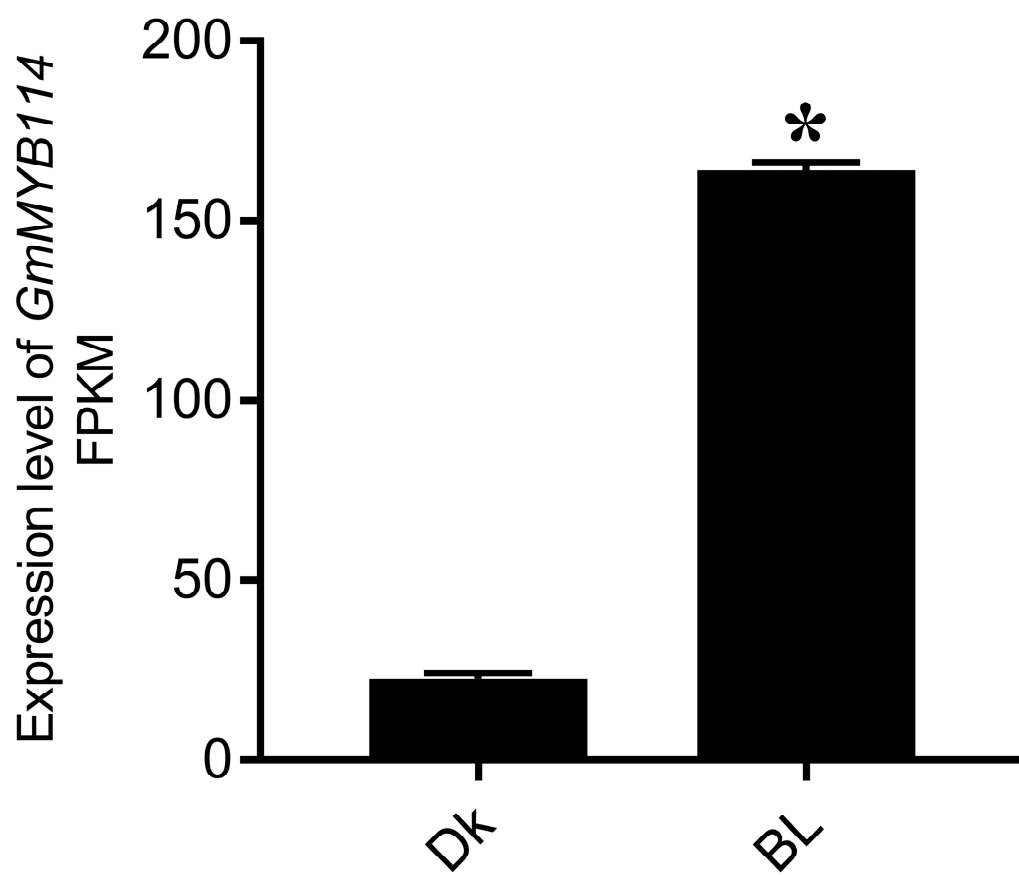

Figure S3

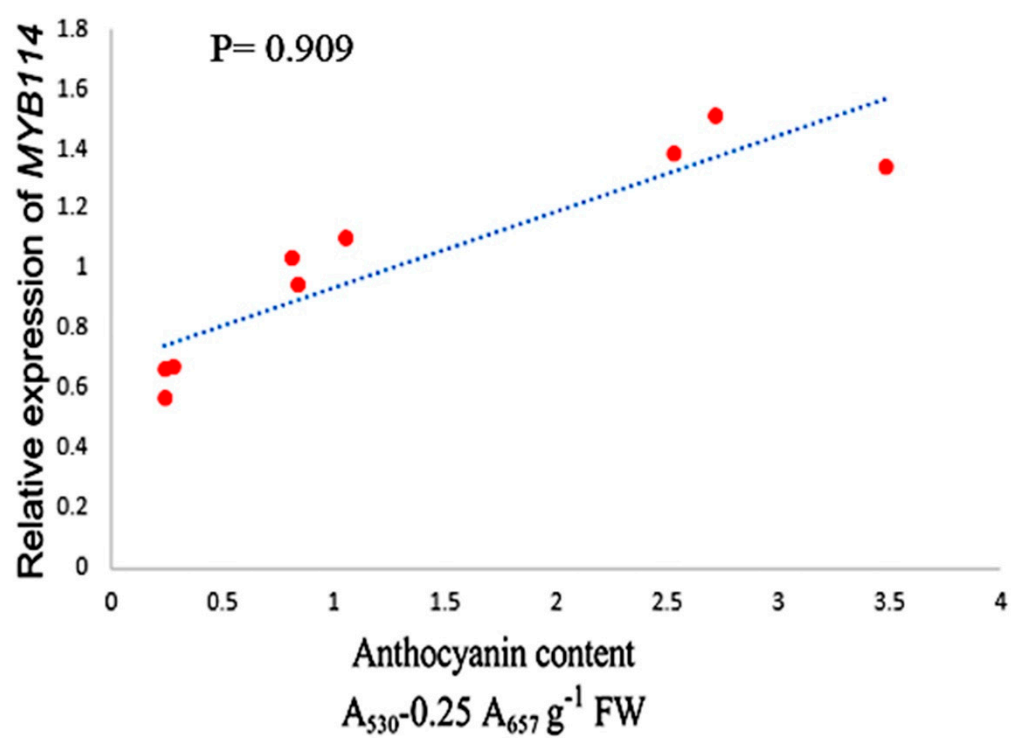

Figure S4

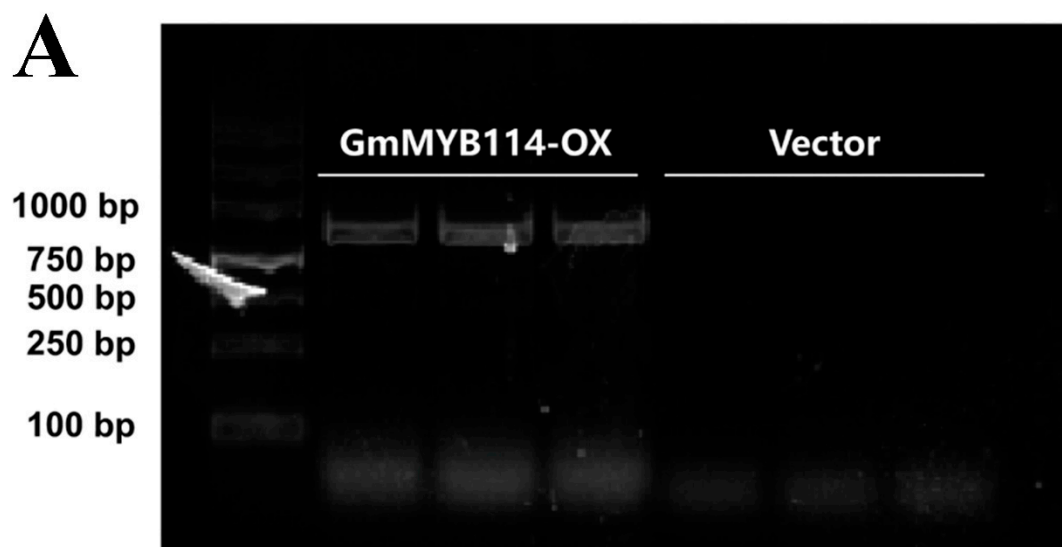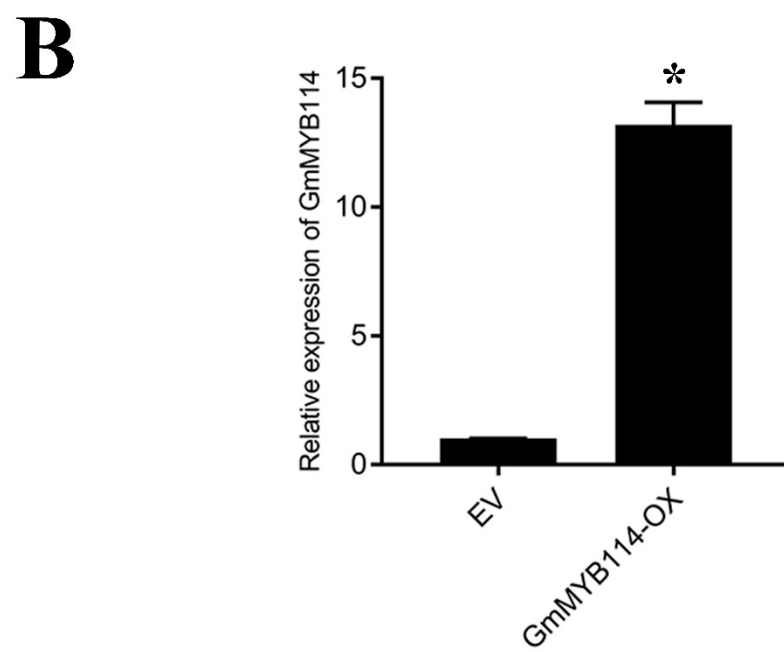

Figure S5

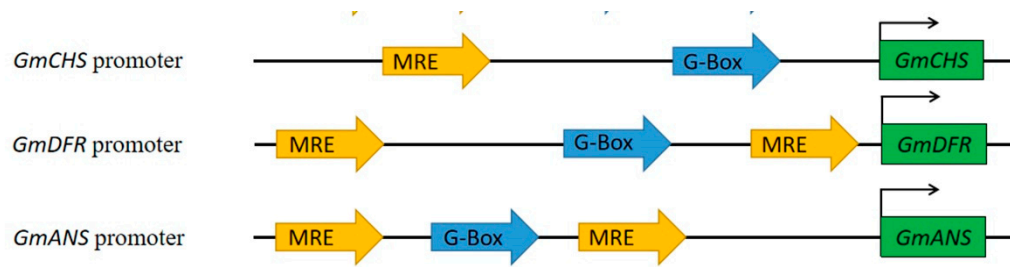

Supplement: s1 [file s1]
